# Supplementary material
Source: Elsevier journal article supplement (http://pure.iiasa.ac.at/14817/2/mmc1.docx)
Supplement: mmc1 [file mmc1.docx]

**Supplementary Information**

**SI Figure 1**. Example of validation process in Sumatra. We selected validation points inside oil palm plantations, and within a 25 km buffer of observed plantations.

**
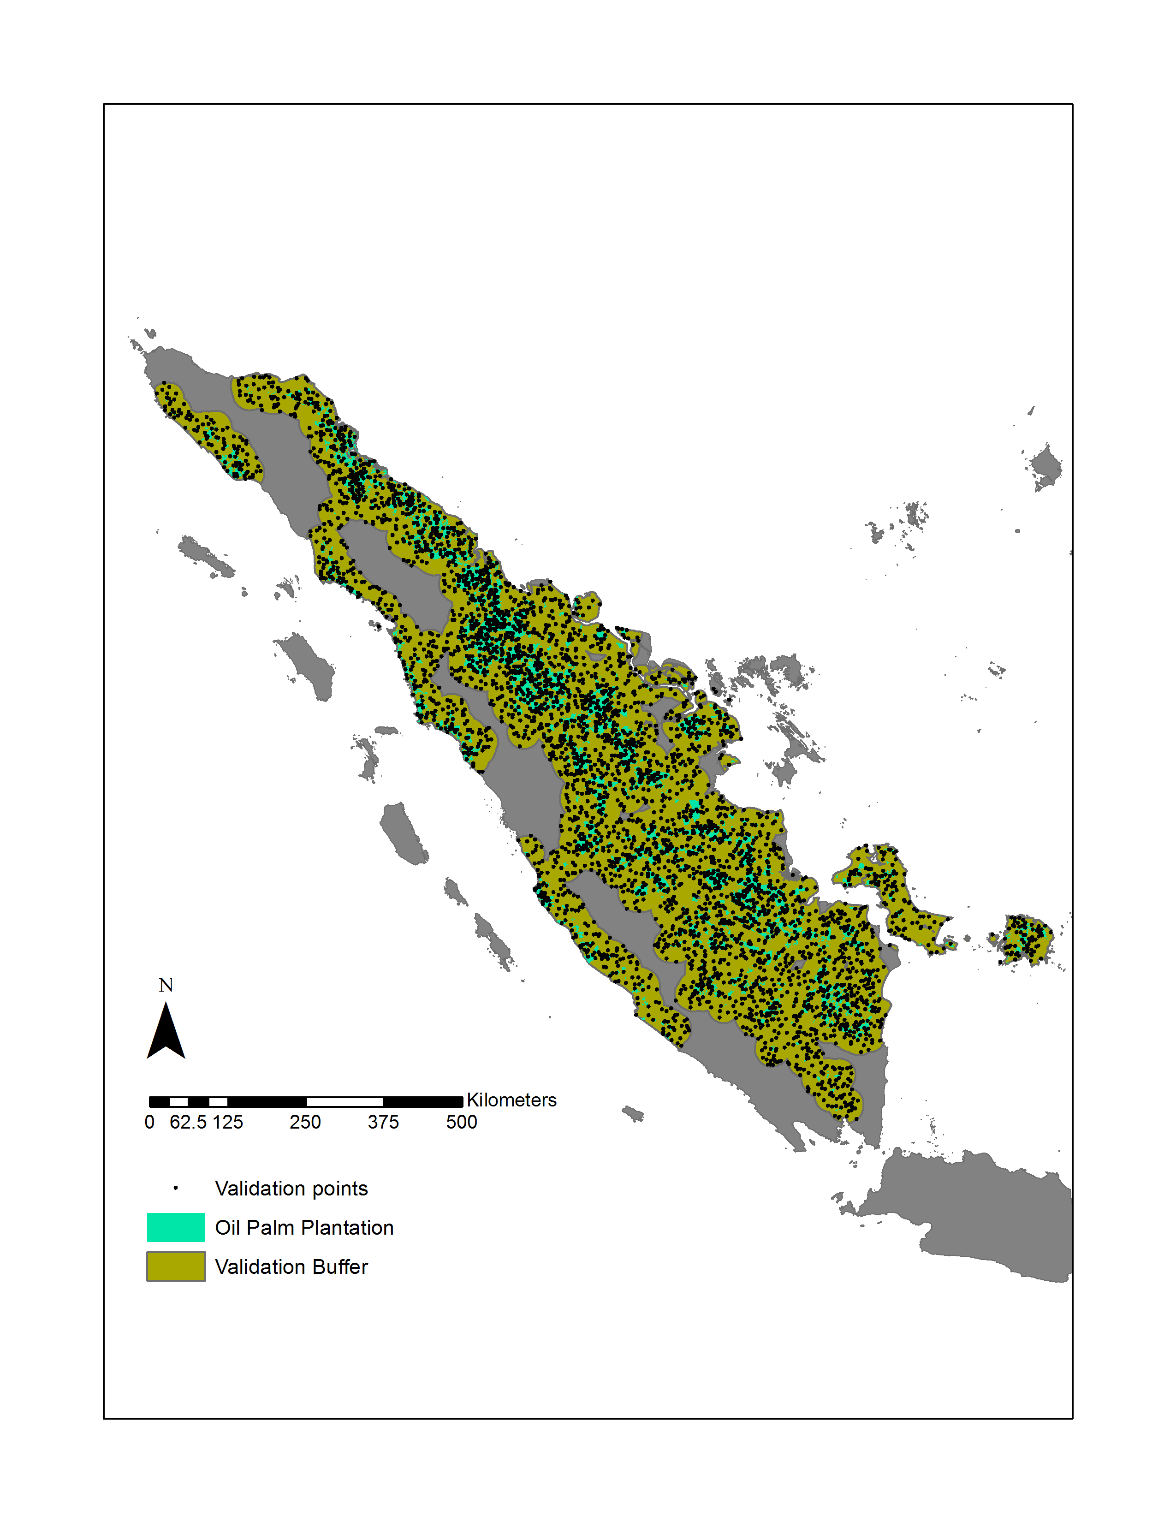
**

**SI Figure 2.** Comparison of estimates of oil palm plantation area in Sumatra, Kalimantan and Papua from this study and from previous studies.

**
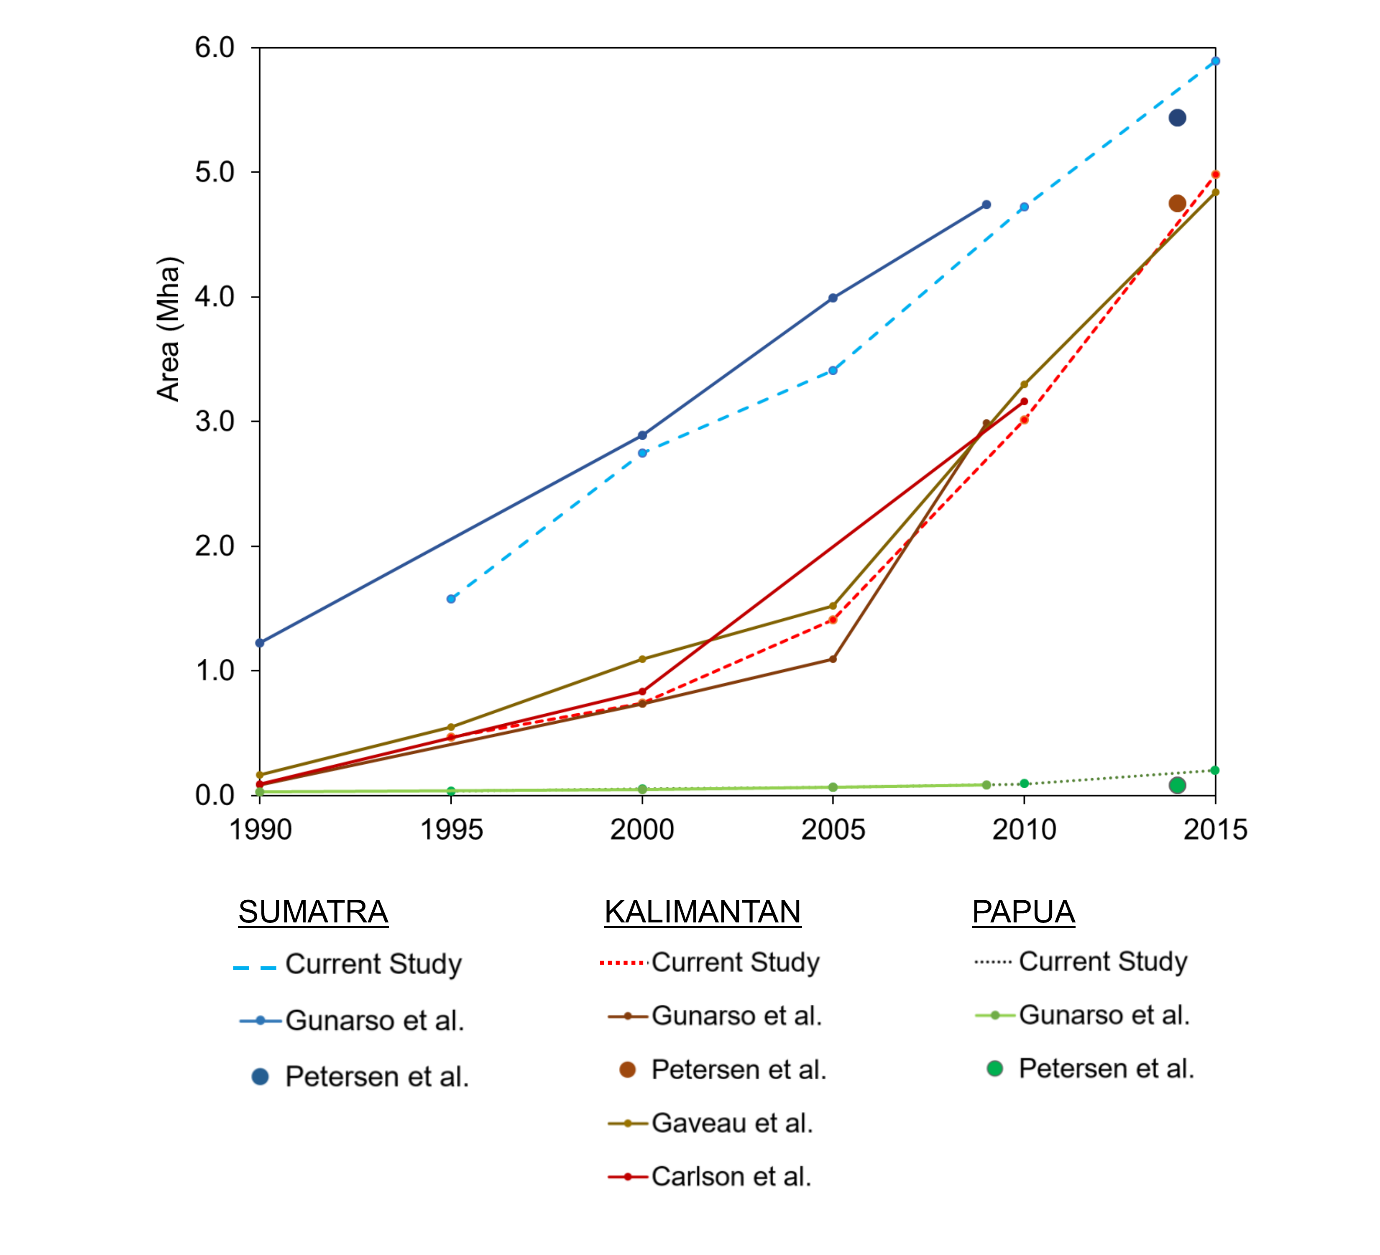
**

**SI Figure 3.** Area of suitable land for cultivation of oil palm, by province. Suitable areas which were not forested in the year 2011 are black, while suitable areas which were forested in 2011 are in grey.

**SI Table 1.** Schema used to reclassify land cover classes from the Ministry of Environment and Forestry.

| **MoEF Class** | **This study** |
| --- | --- |
| Built Environment | Other |
| Water Bodies |
| Mining |
| Scrubland | Scrubland, Bare land, Savannah |
| Bare Land |
| Savannah |
| Swamp Scrubland | Swamp and Swamp Scrubland |
| Swamp |
| HTI | Timber Plantation |
| Dry Rice Land | Agriculture |
| Dry Rice Land Mixed with Scrub |
| Rice Land |
| Transmigration areas |
| Plantations |
| Primary Dry Land Forest | Primary Forest |
| Primary Mangrove Forest |
| Primary Swamp Forest |
| Secondary Dry Land Forest | Secondary Forest |
| Secondary Mangrove Forest |
| Secondary Swamp Forest |

**SI Table 2.** The proportion of oil palm plantations replacing primary or secondary forest cover in the periods 2000 – 2005, 2005 – 2010, and 2010 -2015, according to Margono et al. forest extent map and the MoEF forest extent map. Margono et al. note that their ‘primary degraded’ class corresponds to MoEF secondary forests, and their ‘primary intact’ class corresponds to MoEF primary forest.

|  | 2000 - 2005 | | 2005 - 2010 | | 2010 - 2015 | |
| --- | --- | --- | --- | --- | --- | --- |
|  | Margono et al. | MoEF | Margono et al. | MoEF | Margono et al. | MoEF |
| Secondary forest/ Primary degraded | 23.6% | 22.6% | 21.9% | 20.2% | 16.4% | 16.6% |
| Primary forest / Primary intact | 0.2% | 1.5% | 0.1% | 0.7% | 1.0% | 1.4% |
| **Total Forest** | **23.8%** | **24.0%** | **22.0%** | **20.9%** | **17.4%** | **18.0%** |

**SI Table 3.** Validation of oil palm plantation maps. The confusion matrices provide the proportion of oil palm plantation observations (predictions) which we confirmed using high resolution imagery (actual occurrences), for each year. We report the overall accuracy, sensitivity (rate of true positives) and specificity (rate of true negatives).

| 2015 | | Observed Landsat | | | | |
| --- | --- | --- | --- | --- | --- | --- |
| Not Plantation | | | Plantation | Total |
| Observed High Resolution Imagery | Not Plantation | 243 | | | 36 | 279 |
| Plantation | 6 | | | 189 | 195 |
| Total | 249 | | | 225 | 474 |
| Overall Accuracy | | | 91.1% | | | |
| Sensitivity | | | 96.9% | | | |
| Specificity | | | 87.1% | | | |
| 2010 | | Observed Landsat | | | | |
| Not Plantation | | | Plantation | Total |
| Observed High Resolution Imagery | Not Plantation | 231 | | | 32 | 263 |
| Plantation | 17 | | | 196 | 213 |
| Total | 248 | | | 228 | 476 |
| Overall Accuracy | | | | 89.7% | | |
| Sensitivity | | | | 92.0% | | |
| Specificity | | | | 87.8% | | |
| 2005 | | Observed Landsat | | | | |
| Not Plantation | | | Plantation | Total |
| Observed High Resolution Imagery | Not Plantation | 227 | | | 21 | 248 |
| Plantation | 19 | | | 201 | 220 |
| Total | 246 | | | 222 | 468 |
| Overall Accuracy | | | | 91.5% | | |
| Sensitivity | | | | 91.4% | | |
| Specificity | | | | 91.5% | | |
| 2000 | | Observed Landsat | | | | |
| Not Plantation | | | Plantation | Total |
| Observed High Resolution Imagery | Not Plantation | 225 | | | 20 | 245 |
| Plantation | 20 | | | 198 | 218 |
| Total | 245 | | | 218 | 463 |
| Overall Accuracy | | | | 91.4% | | |
| Sensitivity | | | | 90.8% | | |
| Specificity | | | | 91.8% | | |
| 1995 | | Observed Landsat | | | | |
| Not Plantation | | | Plantation | Total |
| Observed High Resolution Imagery | Not Plantation | 217 | | | 27 | 244 |
| Plantation | 23 | | | 198 | 221 |
| Total | 240 | | | 225 | 465 |
| Overall Accuracy | | | | 89.2% | | |
| Sensitivity | | | | 89.6% | | |
| Specificity | | | | 88.9% | | |

**SI Table 4.** Area of oil palm plantations derived from each land cover classification across Indonesia, and the proportion of each land cover type that overlaid peat soils.

|  | 1995 - 2000 | | 2000 - 2005 | | 2005 - 2010 | | 2010 - 2015 | |
| --- | --- | --- | --- | --- | --- | --- | --- | --- |
|  | Total (kha) | % on Peat | Total (kha) | % on Peat | Total (kha) | % on Peat | Total (kha) | % on Peat |
| Secondary Forest | 757 | 30 | 337 | 33 | 596 | 31 | 540 | 33 |
| Primary Forest | 31 | 38 | 20 | 67 | 20 | 75 | 45 | 25 |
| Swamp, Swamp Scrubland | 85 | 16 | 157 | 41 | 443 | 39 | 541 | 36 |
| Scrubland, Bareland, Savannah | 218 | 9 | 221 | 8 | 684 | 14 | 721 | 13 |
| Agriculture | 323 | 10 | 582 | 5 | 1124 | 10 | 1232 | 8 |
| Timber Plantation | 12 | 2 | 15 | 6 | 33 | 12 | 130 | 35 |
| Other | 35 | 5 | 20 | 2 | 45 | 4 | 38 | 5 |
| Total | 1462 | 21 | 1353 | 18 | 2946 | 20 | 3246 | 19 |

**SI Table 5.** Area and proportion of new oil palm plantations established on each land cover class, for A. Sumatra, B. Kalimantan, and C. Papua.

|  | 1995 - 2000 | | | 2000 - 2005 | | | 2005 - 2010 | | | 2010 - 2015 | |
| --- | --- | --- | --- | --- | --- | --- | --- | --- | --- | --- | --- |
| Area (kha) | % | Area (kha) | | % | Area (kha) | | % | Area (kha) | | % |
| A.      SUMATRA | | | | | | | | | | | |
| Secondary Forest | 646 | 53 | 153 | | 23 | 157 | | 12 | 103 | | 9 |
| Primary Forest | 23 | 2 | 14 | | 2 | 16 | | 1 | 5 | | 0 |
| Swamp Scrubland | 68 | 6 | 79 | | 12 | 192 | | 15 | 214 | | 18 |
| Scrub, Bare land, Savannah | 171 | 14 | 88 | | 13 | 221 | | 17 | 231 | | 20 |
| Agriculture | 280 | 23 | 301 | | 45 | 667 | | 51 | 507 | | 43 |
| Timber Plantation | 7 | 1 | 15 | | 2 | 26 | | 2 | 89 | | 8 |
| Other | 28 | 2 | 17 | | 3 | 36 | | 3 | 19 | | 2 |
| Total | 1222 | 100 | 667 | | 100 | 1314 | | 100 | 1167 | | 100 |
| B.      KALIMANTAN | | | | | | | | | | | |
| Secondary Forest | 101 | 46 | 183 | | 27 | 428 | | 27 | 396 | | 20 |
| Primary Forest | 7 | 3 | 3 | | 0 | 0 | | 0 | 11 | | 1 |
| Swamp Scrubland | 17 | 8 | 78 | | 12 | 250 | | 16 | 325 | | 17 |
| Scrub, Bare land, Savannah | 45 | 21 | 133 | | 20 | 461 | | 29 | 474 | | 24 |
| Agriculture | 37 | 17 | 276 | | 41 | 449 | | 28 | 706 | | 36 |
| Timber Plantation | 5 | 2 | 1 | | 0 | 7 | | 0 | 41 | | 2 |
| Other | 6 | 3 | 3 | | 0 | 9 | | 1 | 19 | | 1 |
| Total | 217 | 100 | 677 | | 100 | 1605 | | 100 | 1972 | | 100 |
| C.      PAPUA | | | | | | | | | | | |
| Secondary Forest | 10 | 45 | 1 | | 6 | 12 | | 43 | 42 | | 39 |
| Primary Forest | 2 | 7 | 3 | | 36 | 4 | | 14 | 29 | | 27 |
| Swamp Scrubland | 0 | 0 | 0 | | 0 | 0 | | 1 | 2 | | 2 |
| Scrub, Bare land, Savannah | 2 | 9 | 0 | | 2 | 2 | | 6 | 15 | | 14 |
| Agriculture | 7 | 30 | 5 | | 52 | 9 | | 33 | 18 | | 17 |
| Timber Plantation | 0 | 0 | 0 | | 0 | 0 | | 0 | 0 | | 0 |
| Other | 2 | 8 | 0 | | 3 | 0 | | 2 | 1 | | 1 |
| Total | 23 | 100 | 9 | | 100 | 27 | | 100 | 107 | | 100 |

**References**

Arima, E., Richards, P., Walker, R., Caldas, M., 2011. Statistical confirmation of indirect land use change in the Brazilian Amazon. Environmental Research Letters 6, 024010.

Austin, K., Alisjahbana, A., Darusman, T., Boediono, R., Budianto, B.E., Purba, C.I., G.B., Pohnan, E., Putraditama, A., Stolle, F., 2014. Indonesia's Forest Moratorium: Impacts and Next Steps. World Resources Institute, Washington, DC.

Austin, K., Lee, M., Clark, C., Forester, B., Urban, D., White, L., Kasibhatla, P., Poulsen, J., 2017. An assessment of high carbon stock and high conservation value approaches to sustainable oil palm cultivation in Gabon. Environmental Research Letters 12, 014005.

Bissonnette, J., De Koninck, R., 2015. Large Plantations versus Smallholdings in Southeast Asia: Historical and Contemporary Trends, Land grabbing, conflict and agrarian‐environmental transformations: perspectives from East and Southeast Asia, Chiang Mai University.

Bregman, T.P., McCoy, K., Servent, R., MacFarquhar, C., 2016. Turning collective commitment into action: Assessing progress by Consumer Goods Forum members towards achieving deforestation-free supply chains. Global Canopy Programme and CDP, UK.

Busch, J., Ferretti-Gallon, K., Engelmann, J., Wright, M., Austin, K.G., Stolle, F., Turubanova, S., Potapov, P.V., Margono, B., Hansen, M.C., Baccini, A., 2015. Reductions in emissions from deforestation from Indonesia’s moratorium on new oil palm, timber, and logging concessions. Proceedings of the National Academy of Sciences 112, 1328-1333.

Butler, R., 2015. Palm oil major makes deforestation-free commitment, Mongabay.com.

Carlson, K.M., Curran, L.M., Asner, G.P., Pittman, A.M., Trigg, S.N., Adeney, J.M., 2013. Carbon emissions from forest conversion by Kalimantan oil palm plantations. Nature Climate Change 3, 283-287.

Climate Focus, 2016. Progress on the New York Declaration on Forests: Eliminating Deforestation from the Production of Agricultural Commodities – Goal 2 Assessment Report.

Donofrio, S., Rothrock, P., Leonard, J., 2017. Supply Change: Tracking Corporate Commitments to Deforestation-Free Supply Chains. Forest Trends, Washington, DC.

Furumo, P., Aide, T., 2017. Characterizing commercial oil palm expansion in Latin America: land use change and trade. Environmental Research Letters 12, 024008.

Gatto, M., Wollni, M., Quim, M., 2015. Oil palm boom and land-use dynamics in Indonesia: The role of policies and socioeconomic factors. Land Use Policy 46, 292-303.

Gaveau, D.L.A., Sheil, D., Husnayaen, Salim, M.A., Arjasakusuma, S., Ancrenaz, M., Pacheco, P., Meijaard, E., 2016. Rapid conversions and avoided deforestation: examining four decades of industrial plantation expansion in Borneo. Scientific Reports 6, 32017.

Gibbs, H.K., Munger, J., L'Roe, J., Barreto, P., Pereira, R., Christie, M., Amaral, T., Walker, N.F., 2016. Did Ranchers and Slaughterhouses Respond to Zero-Deforestation Agreements in the Brazilian Amazon? Conservation Letters 9, 32-42.

Gingold, B., Rosenbarger, A., Muliastra, Y.I.K.D., Stolle, F., Sudana, I.M., Manessa, M.D.M., Murdimanto, A., Tiangga, S.B., Madusari, C.C., Douard, P., 2012. How to Identify Degraded Land for Sustainable Palm Oil in Indonesia. World Resources Institute, Washington, DC.

Goh, C., in review. Identifying key factors for mobilising under-utilised low carbon land resources: A case study on Kalimantan. Land Use Policy.

Gunarso, P., Hartoyo, M.E., Agus, F., 2013. Oil Palm and Land Use Change in Indonesia, Malaysia, and Papua New Guinea, In: Killeen, T., Goon, J. (Eds.), Reports from the Science Panel of the Second RSPO GHG Working Group. Rountable for Sustainable Palm Oil, Kuala Lumpur, Malaysia.

Hansen, M.C., Potapov, P.V., Moore, R., Hancher, M., Turubanova, S.A., Tyukavina, A., Thau, D., Stehman, S.V., Goetz, S.J., Loveland, T.R., Kommareddy, A., Egorov, A., Chini, L., Justice, C.O., Townshend, J.R.G., 2013. High-Resolution Global Maps of 21st-Century Forest Cover Change. Science 342, 850-853.

Heilmayr, R., Lambin, E.F., 2016. Impacts of nonstate, market-driven governance on Chilean forests. Proceedings of the National Academy of Sciences 113, 2910-2915.

IUCN and UNEP-WCMC, 2015. The World Database on Protected Areas (WDPA) [On-line], In: UNEP-WCMC (Ed.), Cambridge, UK.

Jarvis, A., Reuter, H., Nelson, A., E, G., 2008. Hole-filled SRTM for the globe In: CGIAR-CSI (Ed.), SRTM 90m Database, 4 ed.

Kesaulija, F., Sadsoeitoebeon, B., Komarudin, H., Peday, H., Tokede, M., Andriani, R., Obidzinski, K., 2014. Oil palm estate development and its impact on forests and local communities in West Papua: A case study on the Prafi Plain, Working Paper. Center for International Forestry Research, Bogor, Indonesia.

Koh, L.P., Miettinen, J., Liew, S.C., Ghazoul, J., 2011. Remotely sensed evidence of tropical peatland conversion to oil palm. Proceedings of the National Acadamey of Sciences 108, 5127 - 5132.

Koh, L.P., Wilcove, D.S., 2008. Is oil palm agriculture really destroying tropical biodiversity? Conservation Letters 1.

Lambin, E.F., Meyfroidt, P., Rueda, X., Blackman, A., Börner, J., Cerutti, P.O., Dietsch, T., Jungmann, L., Lamarque, P., Lister, J., Walker, N.F., Wunder, S., 2014. Effectiveness and synergies of policy instruments for land use governance in tropical regions. Global Environmental Change 28, 129-140.

Macedo, M.N., DeFries, R.S., Morton, D.C., Stickler, C.M., Galford, G.L., Shimabukuro, Y.E., 2012. Decoupling of deforestation and soy production in the southern Amazon during the late 2000s. Proceedings of the National Academy of Sciences 109, 1341-1346.

Margono, B., Potapov, P., Turubanova, S., Stolle, F., Hansen, M.C., 2014. Primary forest cover loss in Indonesia over 2000 – 2012. Nature Climate Change 4, 730-735.

McCarthy, B., 2016. Supply Change: Tracking Corporate Commitments to Deforestation-free Supply Chains. Forest Trends, Washington, DC.

Meyfroidt, P., Lambin, E., Erb, K., Hertel, T., 2013. Globalization of land use: distant drivers of land change and geographic displacement of land use. Current Opinion in Environmental Sustainability 5, 438-444.

Miteva, D.A., Loucks, C.J., Pattanayak, S.K., 2015. Social and Environmental Impacts of Forest Management Certification in Indonesia. PLOS ONE 10, e0129675.

MoA, 2011. Peta lahan gambut Indonesia Skala 1:250.000 Ministry of Agriculture, Jakarta, Indonesia.

MoEF, 2015. National Forest Inventory, Permanent Sample Plots, Jakarta, Indonesia.

MoF, 2004. Ministerial Decree No. 14/2004 regarding Afforestation and Reforestation under the Clean Development Mechanism (A/R CDM). , Jakarta, Indonesia.

Mosnier, A., Boere, E., Reumann, A., Yowargana, P., Pirker, J., Havlik, P., Pacheco, P., 2017. Palm oil and likely futures: Assessing the potential impacts of zero deforestation commitments and a moratorium on large-scale oil palm plantations in Indonesia. Center for International Forestry Research (CIFOR), Bogor, Indonesia.

Murdiyarso, D., Dewi, S., Lawrence, D., Seymour, F., 2011. Indonesia’s Forest Moratorium: A Stepping Stone to Better Forest Governance? Center for International Forestry Research, Bogor, Indonesia.

Pirard, R., Rivoalen, C., Lawry, S., Pacheco, P., Zrust, M., 2017. A policy network analysis of the palm oil sector in Indonesia: What sustainability to expect?, Working Paper. Center For International Forestry Research, Bogor, Indonesia.

Pirker, J., Mosnier, A., Kraxner, F., Havlík, P., Obersteiner, M., 2016. What are the limits to oil palm expansion? Global Environmental Change 40, 73-81.

Ramdani, F., Hino, M., 2013. Land Use changes and GHG Emissions from Tropical Forest Conversion by Oil Palm Plantations in Riau Province, Indonesi. Plos ONE 8.

Rist, L., Feintrenie, L., Levang, P., 2010. The livelihood impacts of oil palm: smallholders in Indonesia. Biodiversity and Conservation 19, 1009-1024.

Rosenbarger, A., Gingold, B., Prasodjo, R., Alisjahbana, A., Putraditama, A., Tresya, D., 2013. How to Change Legal Land Use Classifications to Support More Sustainable Palm Oil Production in Indonesia. World Resources Institute, Washington, DC.

Rosoman, G., Sheun, S., Opal, C., Anderson, P., Trapshah, R., 2017. The HCS Approach Toolkit. HCS Approach Steering Group,, Singapore.

See, L., Perger, C., Hofer, M., Weichselbaum, J., Dresel, C., Fritz, S., 2015. Laco-Wiki: An open access online portal for land cover validation. ISPRS Ann. Photogramm. Remote Sens. Spatial Inf. Sci. II-3/W5, 167-171.

Streck, C., Lee, D., 2016. “Partnering for Results: Public-Private

Collaboration on Deforestation-Free Supply Chains. Prepared with support from cooperative agreement # S-LMAQM-13-CA-1128 with U.S. Department of State.

United Nations, 2014. New York Declaration on Forests. United Nations, New York, NY.

USDA, 2014. Oilseeds: World Markets and Trade. US Department of Agriculture- Foreign Agricultural Service, Washington, DC.

USGS, 2011. Global Land Survey 2000, 2005, 2010, Sioux Fall,s South Dakota.

Vijay, V., Pimm, S.L., Jenkins, C.N., Smith, S.J., 2016. The Impacts of Oil Palm on Recent Deforestation and Biodiversity Loss. PLoS ONE 11, e0159668.
